# Supplementary material
Source: ML conference proceedings conference paper supplement (https://openaccess.thecvf.com/content/ICCV2021/html/Wu_Towers_of_Babel_ICCV_2021_paper.html)
Supplement: Supplementary file 1 [file Wu_Towers_of_Babel_ICCV_2021_supplemental.zip]

Archive with 1,079 entries (1,062 files):
- SupplementaryMaterial_Paper3383/
- SupplementaryMaterial_Paper3383/.DS_Store
- __MACOSX/
- __MACOSX/SupplementaryMaterial_Paper3383/
- __MACOSX/SupplementaryMaterial_Paper3383/._.DS_Store
- SupplementaryMaterial_Paper3383/html/
- SupplementaryMaterial_Paper3383/html/fontawesome/
- SupplementaryMaterial_Paper3383/html/fontawesome/css/
- SupplementaryMaterial_Paper3383/html/fontawesome/css/all.min.css
- __MACOSX/SupplementaryMaterial_Paper3383/html/
- __MACOSX/SupplementaryMaterial_Paper3383/html/fontawesome/
- __MACOSX/SupplementaryMaterial_Paper3383/html/fontawesome/css/
- __MACOSX/SupplementaryMaterial_Paper3383/html/fontawesome/css/._all.min.css
- __MACOSX/SupplementaryMaterial_Paper3383/html/fontawesome/._css
- SupplementaryMaterial_Paper3383/html/fontawesome/webfonts/
- SupplementaryMaterial_Paper3383/html/fontawesome/webfonts/fa-solid-900.ttf
- __MACOSX/SupplementaryMaterial_Paper3383/html/fontawesome/webfonts/
- __MACOSX/SupplementaryMaterial_Paper3383/html/fontawesome/webfonts/._fa-solid-900.ttf
- SupplementaryMaterial_Paper3383/html/fontawesome/webfonts/fa-regular-400.svg
- __MACOSX/SupplementaryMaterial_Paper3383/html/fontawesome/webfonts/._fa-regular-400.svg
- SupplementaryMaterial_Paper3383/html/fontawesome/webfonts/fa-regular-400.woff2
- __MACOSX/SupplementaryMaterial_Paper3383/html/fontawesome/webfonts/._fa-regular-400.woff2
- SupplementaryMaterial_Paper3383/html/fontawesome/webfonts/fa-solid-900.eot
- __MACOSX/SupplementaryMaterial_Paper3383/html/fontawesome/webfonts/._fa-solid-900.eot
- SupplementaryMaterial_Paper3383/html/fontawesome/webfonts/fa-brands-400.svg
- __MACOSX/SupplementaryMaterial_Paper3383/html/fontawesome/webfonts/._fa-brands-400.svg
- SupplementaryMaterial_Paper3383/html/fontawesome/webfonts/fa-regular-400.woff
- __MACOSX/SupplementaryMaterial_Paper3383/html/fontawesome/webfonts/._fa-regular-400.woff
- SupplementaryMaterial_Paper3383/html/fontawesome/webfonts/fa-brands-400.eot
- __MACOSX/SupplementaryMaterial_Paper3383/html/fontawesome/webfonts/._fa-brands-400.eot
- SupplementaryMaterial_Paper3383/html/fontawesome/webfonts/fa-solid-900.svg
- __MACOSX/SupplementaryMaterial_Paper3383/html/fontawesome/webfonts/._fa-solid-900.svg
- SupplementaryMaterial_Paper3383/html/fontawesome/webfonts/fa-solid-900.woff
- __MACOSX/SupplementaryMaterial_Paper3383/html/fontawesome/webfonts/._fa-solid-900.woff
- SupplementaryMaterial_Paper3383/html/fontawesome/webfonts/fa-regular-400.ttf
- __MACOSX/SupplementaryMaterial_Paper3383/html/fontawesome/webfonts/._fa-regular-400.ttf
- SupplementaryMaterial_Paper3383/html/fontawesome/webfonts/fa-solid-900.woff2
- __MACOSX/SupplementaryMaterial_Paper3383/html/fontawesome/webfonts/._fa-solid-900.woff2
- SupplementaryMaterial_Paper3383/html/fontawesome/webfonts/fa-brands-400.woff2
- __MACOSX/SupplementaryMaterial_Paper3383/html/fontawesome/webfonts/._fa-brands-400.woff2
- SupplementaryMaterial_Paper3383/html/fontawesome/webfonts/fa-brands-400.woff
- __MACOSX/SupplementaryMaterial_Paper3383/html/fontawesome/webfonts/._fa-brands-400.woff
- SupplementaryMaterial_Paper3383/html/fontawesome/webfonts/fa-brands-400.ttf
- __MACOSX/SupplementaryMaterial_Paper3383/html/fontawesome/webfonts/._fa-brands-400.ttf
- SupplementaryMaterial_Paper3383/html/fontawesome/webfonts/fa-regular-400.eot
- __MACOSX/SupplementaryMaterial_Paper3383/html/fontawesome/webfonts/._fa-regular-400.eot
- __MACOSX/SupplementaryMaterial_Paper3383/html/fontawesome/._webfonts
- SupplementaryMaterial_Paper3383/html/fontawesome/LICENSE.txt
- __MACOSX/SupplementaryMaterial_Paper3383/html/fontawesome/._LICENSE.txt
- __MACOSX/SupplementaryMaterial_Paper3383/html/._fontawesome
- SupplementaryMaterial_Paper3383/html/css/
- SupplementaryMaterial_Paper3383/html/css/templatemo-comparto.css
- __MACOSX/SupplementaryMaterial_Paper3383/html/css/
- __MACOSX/SupplementaryMaterial_Paper3383/html/css/._templatemo-comparto.css
- __MACOSX/SupplementaryMaterial_Paper3383/html/._css
- SupplementaryMaterial_Paper3383/html/js/
- SupplementaryMaterial_Paper3383/html/js/isotope.pkgd.min.js
- __MACOSX/SupplementaryMaterial_Paper3383/html/js/
- __MACOSX/SupplementaryMaterial_Paper3383/html/js/._isotope.pkgd.min.js
- SupplementaryMaterial_Paper3383/html/js/jquery.singlePageNav.min.js
- __MACOSX/SupplementaryMaterial_Paper3383/html/js/._jquery.singlePageNav.min.js
- SupplementaryMaterial_Paper3383/html/js/jquery.min.js
- __MACOSX/SupplementaryMaterial_Paper3383/html/js/._jquery.min.js
- SupplementaryMaterial_Paper3383/html/js/imagesloaded.pkgd.min.js
- __MACOSX/SupplementaryMaterial_Paper3383/html/js/._imagesloaded.pkgd.min.js
- __MACOSX/SupplementaryMaterial_Paper3383/html/._js
- SupplementaryMaterial_Paper3383/html/img/
- SupplementaryMaterial_Paper3383/html/img/135
- __MACOSX/SupplementaryMaterial_Paper3383/html/img/
- __MACOSX/SupplementaryMaterial_Paper3383/html/img/._135
- SupplementaryMaterial_Paper3383/html/img/307
- __MACOSX/SupplementaryMaterial_Paper3383/html/img/._307
- SupplementaryMaterial_Paper3383/html/img/61
- __MACOSX/SupplementaryMaterial_Paper3383/html/img/._61
- SupplementaryMaterial_Paper3383/html/img/95
- __MACOSX/SupplementaryMaterial_Paper3383/html/img/._95
- SupplementaryMaterial_Paper3383/html/img/338
- __MACOSX/SupplementaryMaterial_Paper3383/html/img/._338
- SupplementaryMaterial_Paper3383/html/img/300
- __MACOSX/SupplementaryMaterial_Paper3383/html/img/._300
- SupplementaryMaterial_Paper3383/html/img/132
- __MACOSX/SupplementaryMaterial_Paper3383/html/img/._132
- SupplementaryMaterial_Paper3383/html/img/59
- __MACOSX/SupplementaryMaterial_Paper3383/html/img/._59
- SupplementaryMaterial_Paper3383/html/img/92
- __MACOSX/SupplementaryMaterial_Paper3383/html/img/._92
- SupplementaryMaterial_Paper3383/html/img/66
- __MACOSX/SupplementaryMaterial_Paper3383/html/img/._66
- SupplementaryMaterial_Paper3383/html/img/336
- __MACOSX/SupplementaryMaterial_Paper3383/html/img/._336
- SupplementaryMaterial_Paper3383/html/img/104
- __MACOSX/SupplementaryMaterial_Paper3383/html/img/._104
- SupplementaryMaterial_Paper3383/html/img/309
- __MACOSX/SupplementaryMaterial_Paper3383/html/img/._309
- SupplementaryMaterial_Paper3383/html/img/50
- __MACOSX/SupplementaryMaterial_Paper3383/html/img/._50
- SupplementaryMaterial_Paper3383/html/img/68
- __MACOSX/SupplementaryMaterial_Paper3383/html/img/._68
- SupplementaryMaterial_Paper3383/html/img/103
- __MACOSX/SupplementaryMaterial_Paper3383/html/img/._103
- SupplementaryMaterial_Paper3383/html/img/331
- __MACOSX/SupplementaryMaterial_Paper3383/html/img/._331
- SupplementaryMaterial_Paper3383/html/img/57
- __MACOSX/SupplementaryMaterial_Paper3383/html/img/._57
- SupplementaryMaterial_Paper3383/html/img/168
- __MACOSX/SupplementaryMaterial_Paper3383/html/img/._168
- SupplementaryMaterial_Paper3383/html/img/391
- __MACOSX/SupplementaryMaterial_Paper3383/html/img/._391
- SupplementaryMaterial_Paper3383/html/img/365
- __MACOSX/SupplementaryMaterial_Paper3383/html/img/._365
- SupplementaryMaterial_Paper3383/html/img/157
- __MACOSX/SupplementaryMaterial_Paper3383/html/img/._157
- SupplementaryMaterial_Paper3383/html/img/150
- __MACOSX/SupplementaryMaterial_Paper3383/html/img/._150
- SupplementaryMaterial_Paper3383/html/img/362
- __MACOSX/SupplementaryMaterial_Paper3383/html/img/._362
- SupplementaryMaterial_Paper3383/html/img/396
- __MACOSX/SupplementaryMaterial_Paper3383/html/img/._396
- SupplementaryMaterial_Paper3383/html/img/159
- __MACOSX/SupplementaryMaterial_Paper3383/html/img/._159
- SupplementaryMaterial_Paper3383/html/img/32
- __MACOSX/SupplementaryMaterial_Paper3383/html/img/._32
- SupplementaryMaterial_Paper3383/html/img/166
- __MACOSX/SupplementaryMaterial_Paper3383/html/img/._166
- SupplementaryMaterial_Paper3383/html/img/354
- __MACOSX/SupplementaryMaterial_Paper3383/html/img/._354
- SupplementaryMaterial_Paper3383/html/img/192
- __MACOSX/SupplementaryMaterial_Paper3383/html/img/._192
- SupplementaryMaterial_Paper3383/html/img/398
- __MACOSX/SupplementaryMaterial_Paper3383/html/img/._398
- SupplementaryMaterial_Paper3383/html/img/35
- __MACOSX/SupplementaryMaterial_Paper3383/html/img/._35
- SupplementaryMaterial_Paper3383/html/img/195
- __MACOSX/SupplementaryMaterial_Paper3383/html/img/._195
- SupplementaryMaterial_Paper3383/html/img/353
- __MACOSX/SupplementaryMaterial_Paper3383/html/img/._353
- SupplementaryMaterial_Paper3383/html/img/161
- __MACOSX/SupplementaryMaterial_Paper3383/html/img/._161
- SupplementaryMaterial_Paper3383/html/img/330
- __MACOSX/SupplementaryMaterial_Paper3383/html/img/._330
- SupplementaryMaterial_Paper3383/html/img/102
- __MACOSX/SupplementaryMaterial_Paper3383/html/img/._102
- SupplementaryMaterial_Paper3383/html/img/69
- __MACOSX/SupplementaryMaterial_Paper3383/html/img/._69
- SupplementaryMaterial_Paper3383/html/img/56
- __MACOSX/SupplementaryMaterial_Paper3383/html/img/._56
- SupplementaryMaterial_Paper3383/html/img/105
- __MACOSX/SupplementaryMaterial_Paper3383/html/img/._105
- SupplementaryMaterial_Paper3383/html/img/337
- __MACOSX/SupplementaryMaterial_Paper3383/html/img/._337
- SupplementaryMaterial_Paper3383/html/img/51
- __MACOSX/SupplementaryMaterial_Paper3383/html/img/._51
- SupplementaryMaterial_Paper3383/html/img/308
- __MACOSX/SupplementaryMaterial_Paper3383/html/img/._308
- SupplementaryMaterial_Paper3383/html/img/58
- __MACOSX/SupplementaryMaterial_Paper3383/html/img/._58
- SupplementaryMaterial_Paper3383/html/img/133
- __MACOSX/SupplementaryMaterial_Paper3383/html/img/._133
- SupplementaryMaterial_Paper3383/html/img/301
- __MACOSX/SupplementaryMaterial_Paper3383/html/img/._301
- SupplementaryMaterial_Paper3383/html/img/67
- __MACOSX/SupplementaryMaterial_Paper3383/html/img/._67
- SupplementaryMaterial_Paper3383/html/img/93
- __MACOSX/SupplementaryMaterial_Paper3383/html/img/._93
- SupplementaryMaterial_Paper3383/html/img/306
- __MACOSX/SupplementaryMaterial_Paper3383/html/img/._306
- SupplementaryMaterial_Paper3383/html/img/134
- __MACOSX/SupplementaryMaterial_Paper3383/html/img/._134
- SupplementaryMaterial_Paper3383/html/img/94
- __MACOSX/SupplementaryMaterial_Paper3383/html/img/._94
- SupplementaryMaterial_Paper3383/html/img/339
- __MACOSX/SupplementaryMaterial_Paper3383/html/img/._339
- SupplementaryMaterial_Paper3383/html/img/60
- __MACOSX/SupplementaryMaterial_Paper3383/html/img/._60
- SupplementaryMaterial_Paper3383/html/img/399
- __MACOSX/SupplementaryMaterial_Paper3383/html/img/._399
- SupplementaryMaterial_Paper3383/html/img/34
- __MACOSX/SupplementaryMaterial_Paper3383/html/img/._34
- SupplementaryMaterial_Paper3383/html/img/160
- __MACOSX/SupplementaryMaterial_Paper3383/html/img/._160
- SupplementaryMaterial_Paper3383/html/img/352
- __MACOSX/SupplementaryMaterial_Paper3383/html/img/._352
- SupplementaryMaterial_Paper3383/html/img/194
- __MACOSX/SupplementaryMaterial_Paper3383/html/img/._194
- SupplementaryMaterial_Paper3383/html/img/33
- __MACOSX/SupplementaryMaterial_Paper3383/html/img/._33
- SupplementaryMaterial_Paper3383/html/img/158
- __MACOSX/SupplementaryMaterial_Paper3383/html/img/._158
- SupplementaryMaterial_Paper3383/html/img/193
- __MACOSX/SupplementaryMaterial_Paper3383/html/img/._193
- SupplementaryMaterial_Paper3383/html/img/355
- __MACOSX/SupplementaryMaterial_Paper3383/html/img/._355
- SupplementaryMaterial_Paper3383/html/img/167
- __MACOSX/SupplementaryMaterial_Paper3383/html/img/._167
- SupplementaryMaterial_Paper3383/html/img/397
- __MACOSX/SupplementaryMaterial_Paper3383/html/img/._397
- SupplementaryMaterial_Paper3383/html/img/363
- __MACOSX/SupplementaryMaterial_Paper3383/html/img/._363
- SupplementaryMaterial_Paper3383/html/img/151
- __MACOSX/SupplementaryMaterial_Paper3383/html/img/._151
- SupplementaryMaterial_Paper3383/html/img/169
- __MACOSX/SupplementaryMaterial_Paper3383/html/img/._169
- SupplementaryMaterial_Paper3383/html/img/156
- __MACOSX/SupplementaryMaterial_Paper3383/html/img/._156
- SupplementaryMaterial_Paper3383/html/img/364
- __MACOSX/SupplementaryMaterial_Paper3383/html/img/._364
- SupplementaryMaterial_Paper3383/html/img/390
- __MACOSX/SupplementaryMaterial_Paper3383/html/img/._390
- SupplementaryMaterial_Paper3383/html/img/216
- __MACOSX/SupplementaryMaterial_Paper3383/html/img/._216
- SupplementaryMaterial_Paper3383/html/img/440
- __MACOSX/SupplementaryMaterial_Paper3383/html/img/._440
- SupplementaryMaterial_Paper3383/html/img/229
- __MACOSX/SupplementaryMaterial_Paper3383/html/img/._229
- SupplementaryMaterial_Paper3383/html/img/447
- __MACOSX/SupplementaryMaterial_Paper3383/html/img/._447
- SupplementaryMaterial_Paper3383/html/img/211
- __MACOSX/SupplementaryMaterial_Paper3383/html/img/._211
- SupplementaryMaterial_Paper3383/html/img/478
- __MACOSX/SupplementaryMaterial_Paper3383/html/img/._478
- SupplementaryMaterial_Paper3383/html/img/227
- __MACOSX/SupplementaryMaterial_Paper3383/html/img/._227
- SupplementaryMaterial_Paper3383/html/img/471
- __MACOSX/SupplementaryMaterial_Paper3383/html/img/._471
- SupplementaryMaterial_Paper3383/html/img/485
- __MACOSX/SupplementaryMaterial_Paper3383/html/img/._485
- SupplementaryMaterial_Paper3383/html/img/218
- __MACOSX/SupplementaryMaterial_Paper3383/html/img/._218
- SupplementaryMaterial_Paper3383/html/img/482
- __MACOSX/SupplementaryMaterial_Paper3383/html/img/._482
- SupplementaryMaterial_Paper3383/html/img/476
- __MACOSX/SupplementaryMaterial_Paper3383/html/img/._476
- SupplementaryMaterial_Paper3383/html/img/220
- __MACOSX/SupplementaryMaterial_Paper3383/html/img/._220
- SupplementaryMaterial_Paper3383/html/img/449
- __MACOSX/SupplementaryMaterial_Paper3383/html/img/._449
- SupplementaryMaterial_Paper3383/html/img/280
- __MACOSX/SupplementaryMaterial_Paper3383/html/img/._280
- SupplementaryMaterial_Paper3383/html/img/422
- __MACOSX/SupplementaryMaterial_Paper3383/html/img/._422
- SupplementaryMaterial_Paper3383/html/img/274
- __MACOSX/SupplementaryMaterial_Paper3383/html/img/._274
- SupplementaryMaterial_Paper3383/html/img/273
- __MACOSX/SupplementaryMaterial_Paper3383/html/img/._273
- SupplementaryMaterial_Paper3383/html/img/425
- __MACOSX/SupplementaryMaterial_Paper3383/html/img/._425
- SupplementaryMaterial_Paper3383/html/img/287
- __MACOSX/SupplementaryMaterial_Paper3383/html/img/._287
- SupplementaryMaterial_Paper3383/html/img/413
- __MACOSX/SupplementaryMaterial_Paper3383/html/img/._413
- SupplementaryMaterial_Paper3383/html/img/245
- __MACOSX/SupplementaryMaterial_Paper3383/html/img/._245
- SupplementaryMaterial_Paper3383/html/img/289
- __MACOSX/SupplementaryMaterial_Paper3383/html/img/._289
- SupplementaryMaterial_Paper3383/html/img/242
- __MACOSX/SupplementaryMaterial_Paper3383/html/img/._242
- SupplementaryMaterial_Paper3383/html/img/414
- __MACOSX/SupplementaryMaterial_Paper3383/html/img/._414
- SupplementaryMaterial_Paper3383/html/img/477
- __MACOSX/SupplementaryMaterial_Paper3383/html/img/._477
- SupplementaryMaterial_Paper3383/html/img/221
- __MACOSX/SupplementaryMaterial_Paper3383/html/img/._221
- SupplementaryMaterial_Paper3383/html/img/483
- __MACOSX/SupplementaryMaterial_Paper3383/html/img/._483
- SupplementaryMaterial_Paper3383/html/img/448
- __MACOSX/SupplementaryMaterial_Paper3383/html/img/._448
- SupplementaryMaterial_Paper3383/html/img/484
- __MACOSX/SupplementaryMaterial_Paper3383/html/img/._484
- SupplementaryMaterial_Paper3383/html/img/226
- __MACOSX/SupplementaryMaterial_Paper3383/html/img/._226
- SupplementaryMaterial_Paper3383/html/img/470
- __MACOSX/SupplementaryMaterial_Paper3383/html/img/._470
- SupplementaryMaterial_Paper3383/html/img/219
- __MACOSX/SupplementaryMaterial_Paper3383/html/img/._219
- SupplementaryMaterial_Paper3383/html/img/446
- __MACOSX/SupplementaryMaterial_Paper3383/html/img/._446
- SupplementaryMaterial_Paper3383/html/img/210
- __MACOSX/SupplementaryMaterial_Paper3383/html/img/._210
- SupplementaryMaterial_Paper3383/html/img/479
- __MACOSX/SupplementaryMaterial_Paper3383/html/img/._479
- SupplementaryMaterial_Paper3383/html/img/217
- __MACOSX/SupplementaryMaterial_Paper3383/html/img/._217
- SupplementaryMaterial_Paper3383/html/img/441
- __MACOSX/SupplementaryMaterial_Paper3383/html/img/._441
- SupplementaryMaterial_Paper3383/html/img/228
- __MACOSX/SupplementaryMaterial_Paper3383/html/img/._228
- SupplementaryMaterial_Paper3383/html/img/288
- __MACOSX/SupplementaryMaterial_Paper3383/html/img/._288
- SupplementaryMaterial_Paper3383/html/img/243
- __MACOSX/SupplementaryMaterial_Paper3383/html/img/._243
- SupplementaryMaterial_Paper3383/html/img/415
- __MACOSX/SupplementaryMaterial_Paper3383/html/img/._415
- SupplementaryMaterial_Paper3383/html/img/412
- __MACOSX/SupplementaryMaterial_Paper3383/html/img/._412
- SupplementaryMaterial_Paper3383/html/img/244
- __MACOSX/SupplementaryMaterial_Paper3383/html/img/._244
- SupplementaryMaterial_Paper3383/html/img/286
- __MACOSX/SupplementaryMaterial_Paper3383/html/img/._286
- SupplementaryMaterial_Paper3383/html/img/272
- __MACOSX/SupplementaryMaterial_Paper3383/html/img/._272
[truncated: 779 more entries]
