# Supplementary material
Source: ML conference proceedings conference paper supplement (https://openaccess.thecvf.com/content/ICCV2021/html/Wu_Towers_of_Babel_ICCV_2021_paper.html)
Supplement: Supplementary file 1 [file Wu_Towers_of_Babel_ICCV_2021_supplemental.zip › SupplementaryMaterial_Paper3383/html/js/isotope.pkgd.min.js]

/*!
 * Isotope PACKAGED v3.0.6
 *
 * Licensed GPLv3 for open source use
 * or Isotope Commercial License for commercial use
 *
 * https://isotope.metafizzy.co
 * Copyright 2010-2018 Metafizzy
 */

!(function(t, e) {
  "function" == typeof define && define.amd
    ? define("jquery-bridget/jquery-bridget", ["jquery"], function(i) {
        return e(t, i);
      })
    : "object" == typeof module && module.exports
    ? (module.exports = e(t, require("jquery")))
    : (t.jQueryBridget = e(t, t.jQuery));
})(window, function(t, e) {
  "use strict";
  function i(i, s, a) {
    function u(t, e, o) {
      var n,
        s = "$()." + i + '("' + e + '")';
      return (
        t.each(function(t, u) {
          var h = a.data(u, i);
          if (!h)
            return void r(
              i + " not initialized. Cannot call methods, i.e. " + s
            );
          var d = h[e];
          if (!d || "_" == e.charAt(0))
            return void r(s + " is not a valid method");
          var l = d.apply(h, o);
          n = void 0 === n ? l : n;
        }),
        void 0 !== n ? n : t
      );
    }
    function h(t, e) {
      t.each(function(t, o) {
        var n = a.data(o, i);
        n ? (n.option(e), n._init()) : ((n = new s(o, e)), a.data(o, i, n));
      });
    }
    (a = a || e || t.jQuery),
      a &&
        (s.prototype.option ||
          (s.prototype.option = function(t) {
            a.isPlainObject(t) &&
              (this.options = a.extend(!0, this.options, t));
          }),
        (a.fn[i] = function(t) {
          if ("string" == typeof t) {
            var e = n.call(arguments, 1);
            return u(this, t, e);
          }
          return h(this, t), this;
        }),
        o(a));
  }
  function o(t) {
    !t || (t && t.bridget) || (t.bridget = i);
  }
  var n = Array.prototype.slice,
    s = t.console,
    r =
      "undefined" == typeof s
        ? function() {}
        : function(t) {
            s.error(t);
          };
  return o(e || t.jQuery), i;
}),
  (function(t, e) {
    "function" == typeof define && define.amd
      ? define("ev-emitter/ev-emitter", e)
      : "object" == typeof module && module.exports
      ? (module.exports = e())
      : (t.EvEmitter = e());
  })("undefined" != typeof window ? window : this, function() {
    function t() {}
    var e = t.prototype;
    return (
      (e.on = function(t, e) {
        if (t && e) {
          var i = (this._events = this._events || {}),
            o = (i[t] = i[t] || []);
          return o.indexOf(e) == -1 && o.push(e), this;
        }
      }),
      (e.once = function(t, e) {
        if (t && e) {
          this.on(t, e);
          var i = (this._onceEvents = this._onceEvents || {}),
            o = (i[t] = i[t] || {});
          return (o[e] = !0), this;
        }
      }),
      (e.off = function(t, e) {
        var i = this._events && this._events[t];
        if (i && i.length) {
          var o = i.indexOf(e);
          return o != -1 && i.splice(o, 1), this;
        }
      }),
      (e.emitEvent = function(t, e) {
        var i = this._events && this._events[t];
        if (i && i.length) {
          (i = i.slice(0)), (e = e || []);
          for (
            var o = this._onceEvents && this._onceEvents[t], n = 0;
            n < i.length;
            n++
          ) {
            var s = i[n],
              r = o && o[s];
            r && (this.off(t, s), delete o[s]), s.apply(this, e);
          }
          return this;
        }
      }),
      (e.allOff = function() {
        delete this._events, delete this._onceEvents;
      }),
      t
    );
  }),
  (function(t, e) {
    "function" == typeof define && define.amd
      ? define("get-size/get-size", e)
      : "object" == typeof module && module.exports
      ? (module.exports = e())
      : (t.getSize = e());
  })(window, function() {
    "use strict";
    function t(t) {
      var e = parseFloat(t),
        i = t.indexOf("%") == -1 && !isNaN(e);
      return i && e;
    }
    function e() {}
    function i() {
      for (
        var t = {
            width: 0,
            height: 0,
            innerWidth: 0,
            innerHeight: 0,
            outerWidth: 0,
            outerHeight: 0
          },
          e = 0;
        e < h;
        e++
      ) {
        var i = u[e];
        t[i] = 0;
      }
      return t;
    }
    function o(t) {
      var e = getComputedStyle(t);
      return (
        e ||
          a(
            "Style returned " +
              e +
              ". Are you running this code in a hidden iframe on Firefox? See https://bit.ly/getsizebug1"
          ),
        e
      );
    }
    function n() {
      if (!d) {
        d = !0;
        var e = document.createElement("div");
        (e.style.width = "200px"),
          (e.style.padding = "1px 2px 3px 4px"),
          (e.style.borderStyle = "solid"),
          (e.style.borderWidth = "1px 2px 3px 4px"),
          (e.style.boxSizing = "border-box");
        var i = document.body || document.documentElement;
        i.appendChild(e);
        var n = o(e);
        (r = 200 == Math.round(t(n.width))),
          (s.isBoxSizeOuter = r),
          i.removeChild(e);
      }
    }
    function s(e) {
      if (
        (n(),
        "string" == typeof e && (e = document.querySelector(e)),
        e && "object" == typeof e && e.nodeType)
      ) {
        var s = o(e);
        if ("none" == s.display) return i();
        var a = {};
        (a.width = e.offsetWidth), (a.height = e.offsetHeight);
        for (
          var d = (a.isBorderBox = "border-box" == s.boxSizing), l = 0;
          l < h;
          l++
        ) {
          var f = u[l],
            c = s[f],
            m = parseFloat(c);
          a[f] = isNaN(m) ? 0 : m;
        }
        var p = a.paddingLeft + a.paddingRight,
          y = a.paddingTop + a.paddingBottom,
          g = a.marginLeft + a.marginRight,
          v = a.marginTop + a.marginBottom,
          _ = a.borderLeftWidth + a.borderRightWidth,
          z = a.borderTopWidth + a.borderBottomWidth,
          I = d && r,
          x = t(s.width);
        x !== !1 && (a.width = x + (I ? 0 : p + _));
        var S = t(s.height);
        return (
          S !== !1 && (a.height = S + (I ? 0 : y + z)),
          (a.innerWidth = a.width - (p + _)),
          (a.innerHeight = a.height - (y + z)),
          (a.outerWidth = a.width + g),
          (a.outerHeight = a.height + v),
          a
        );
      }
    }
    var r,
      a =
        "undefined" == typeof console
          ? e
          : function(t) {
              console.error(t);
            },
      u = [
        "paddingLeft",
        "paddingRight",
        "paddingTop",
        "paddingBottom",
        "marginLeft",
        "marginRight",
        "marginTop",
        "marginBottom",
        "borderLeftWidth",
        "borderRightWidth",
        "borderTopWidth",
        "borderBottomWidth"
      ],
      h = u.length,
      d = !1;
    return s;
  }),
  (function(t, e) {
    "use strict";
    "function" == typeof define && define.amd
      ? define("desandro-matches-selector/matches-selector", e)
      : "object" == typeof module && module.exports
      ? (module.exports = e())
      : (t.matchesSelector = e());
  })(window, function() {
    "use strict";
    var t = (function() {
      var t = window.Element.prototype;
      if (t.matches) return "matches";
      if (t.matchesSelector) return "matchesSelector";
      for (var e = ["webkit", "moz", "ms", "o"], i = 0; i < e.length; i++) {
        var o = e[i],
          n = o + "MatchesSelector";
        if (t[n]) return n;
      }
    })();
    return function(e, i) {
      return e[t](i);
    };
  }),
  (function(t, e) {
    "function" == typeof define && define.amd
      ? define("fizzy-ui-utils/utils", [
          "desandro-matches-selector/matches-selector"
        ], function(i) {
          return e(t, i);
        })
      : "object" == typeof module && module.exports
      ? (module.exports = e(t, require("desandro-matches-selector")))
      : (t.fizzyUIUtils = e(t, t.matchesSelector));
  })(window, function(t, e) {
    var i = {};
    (i.extend = function(t, e) {
      for (var i in e) t[i] = e[i];
      return t;
    }),
      (i.modulo = function(t, e) {
        return ((t % e) + e) % e;
      });
    var o = Array.prototype.slice;
    (i.makeArray = function(t) {
      if (Array.isArray(t)) return t;
      if (null === t || void 0 === t) return [];
      var e = "object" == typeof t && "number" == typeof t.length;
      return e ? o.call(t) : [t];
    }),
      (i.removeFrom = function(t, e) {
        var i = t.indexOf(e);
        i != -1 && t.splice(i, 1);
      }),
      (i.getParent = function(t, i) {
        for (; t.parentNode && t != document.body; )
          if (((t = t.parentNode), e(t, i))) return t;
      }),
      (i.getQueryElement = function(t) {
        return "string" == typeof t ? document.querySelector(t) : t;
      }),
      (i.handleEvent = function(t) {
        var e = "on" + t.type;
        this[e] && this[e](t);
      }),
      (i.filterFindElements = function(t, o) {
        t = i.makeArray(t);
        var n = [];
        return (
          t.forEach(function(t) {
            if (t instanceof HTMLElement) {
              if (!o) return void n.push(t);
              e(t, o) && n.push(t);
              for (var i = t.querySelectorAll(o), s = 0; s < i.length; s++)
                n.push(i[s]);
            }
          }),
          n
        );
      }),
      (i.debounceMethod = function(t, e, i) {
        i = i || 100;
        var o = t.prototype[e],
          n = e + "Timeout";
        t.prototype[e] = function() {
          var t = this[n];
          clearTimeout(t);
          var e = arguments,
            s = this;
          this[n] = setTimeout(function() {
            o.apply(s, e), delete s[n];
          }, i);
        };
      }),
      (i.docReady = function(t) {
        var e = document.readyState;
        "complete" == e || "interactive" == e
          ? setTimeout(t)
          : document.addEventListener("DOMContentLoaded", t);
      }),
      (i.toDashed = function(t) {
        return t
          .replace(/(.)([A-Z])/g, function(t, e, i) {
            return e + "-" + i;
          })
          .toLowerCase();
      });
    var n = t.console;
    return (
      (i.htmlInit = function(e, o) {
        i.docReady(function() {
          var s = i.toDashed(o),
            r = "data-" + s,
            a = document.querySelectorAll("[" + r + "]"),
            u = document.querySelectorAll(".js-" + s),
            h = i.makeArray(a).concat(i.makeArray(u)),
            d = r + "-options",
            l = t.jQuery;
          h.forEach(function(t) {
            var i,
              s = t.getAttribute(r) || t.getAttribute(d);
            try {
              i = s && JSON.parse(s);
            } catch (a) {
              return void (
                n &&
                n.error("Error parsing " + r + " on " + t.className + ": " + a)
              );
            }
            var u = new e(t, i);
            l && l.data(t, o, u);
          });
        });
      }),
      i
    );
  }),
  (function(t, e) {
    "function" == typeof define && define.amd
      ? define("outlayer/item", [
          "ev-emitter/ev-emitter",
          "get-size/get-size"
        ], e)
      : "object" == typeof module && module.exports
      ? (module.exports = e(require("ev-emitter"), require("get-size")))
      : ((t.Outlayer = {}), (t.Outlayer.Item = e(t.EvEmitter, t.getSize)));
  })(window, function(t, e) {
    "use strict";
    function i(t) {
      for (var e in t) return !1;
      return (e = null), !0;
    }
    function o(t, e) {
      t &&
        ((this.element = t),
        (this.layout = e),
        (this.position = { x: 0, y: 0 }),
        this._create());
    }
    function n(t) {
      return t.replace(/([A-Z])/g, function(t) {
        return "-" + t.toLowerCase();
      });
    }
    var s = document.documentElement.style,
      r = "string" == typeof s.transition ? "transition" : "WebkitTransition",
      a = "string" == typeof s.transform ? "transform" : "WebkitTransform",
      u = {
        WebkitTransition: "webkitTransitionEnd",
        transition: "transitionend"
      }[r],
      h = {
        transform: a,
        transition: r,
        transitionDuration: r + "Duration",
        transitionProperty: r + "Property",
        transitionDelay: r + "Delay"
      },
      d = (o.prototype = Object.create(t.prototype));
    (d.constructor = o),
      (d._create = function() {
        (this._transn = { ingProperties: {}, clean: {}, onEnd: {} }),
          this.css({ position: "absolute" });
      }),
      (d.handleEvent = function(t) {
        var e = "on" + t.type;
        this[e] && this[e](t);
      }),
      (d.getSize = function() {
        this.size = e(this.element);
      }),
      (d.css = function(t) {
        var e = this.element.style;
        for (var i in t) {
          var o = h[i] || i;
          e[o] = t[i];
        }
      }),
      (d.getPosition = function() {
        var t = getComputedStyle(this.element),
          e = this.layout._getOption("originLeft"),
          i = this.layout._getOption("originTop"),
          o = t[e ? "left" : "right"],
          n = t[i ? "top" : "bottom"],
          s = parseFloat(o),
          r = parseFloat(n),
          a = this.layout.size;
        o.indexOf("%") != -1 && (s = (s / 100) * a.width),
          n.indexOf("%") != -1 && (r = (r / 100) * a.height),
          (s = isNaN(s) ? 0 : s),
          (r = isNaN(r) ? 0 : r),
          (s -= e ? a.paddingLeft : a.paddingRight),
          (r -= i ? a.paddingTop : a.paddingBottom),
          (this.position.x = s),
          (this.position.y = r);
      }),
      (d.layoutPosition = function() {
        var t = this.layout.size,
          e = {},
          i = this.layout._getOption("originLeft"),
          o = this.layout._getOption("originTop"),
          n = i ? "paddingLeft" : "paddingRight",
          s = i ? "left" : "right",
          r = i ? "right" : "left",
          a = this.position.x + t[n];
        (e[s] = this.getXValue(a)), (e[r] = "");
        var u = o ? "paddingTop" : "paddingBottom",
          h = o ? "top" : "bottom",
          d = o ? "bottom" : "top",
          l = this.position.y + t[u];
        (e[h] = this.getYValue(l)),
          (e[d] = ""),
          this.css(e),
          this.emitEvent("layout", [this]);
      }),
      (d.getXValue = function(t) {
        var e = this.layout._getOption("horizontal");
        return this.layout.options.percentPosition && !e
          ? (t / this.layout.size.width) * 100 + "%"
          : t + "px";
      }),
      (d.getYValue = function(t) {
        var e = this.layout._getOption("horizontal");
        return this.layout.options.percentPosition && e
          ? (t / this.layout.size.height) * 100 + "%"
          : t + "px";
      }),
      (d._transitionTo = function(t, e) {
        this.getPosition();
        var i = this.position.x,
          o = this.position.y,
          n = t == this.position.x && e == this.position.y;
        if ((this.setPosition(t, e), n && !this.isTransitioning))
          return void this.layoutPosition();
        var s = t - i,
          r = e - o,
          a = {};
        (a.transform = this.getTranslate(s, r)),
          this.transition({
            to: a,
            onTransitionEnd: { transform: this.layoutPosition },
            isCleaning: !0
          });
      }),
      (d.getTranslate = function(t, e) {
        var i = this.layout._getOption("originLeft"),
          o = this.layout._getOption("originTop");
        return (
          (t = i ? t : -t),
          (e = o ? e : -e),
          "translate3d(" + t + "px, " + e + "px, 0)"
        );
      }),
      (d.goTo = function(t, e) {
        this.setPosition(t, e), this.layoutPosition();
      }),
      (d.moveTo = d._transitionTo),
      (d.setPosition = function(t, e) {
        (this.position.x = parseFloat(t)), (this.position.y = parseFloat(e));
      }),
      (d._nonTransition = function(t) {
        this.css(t.to), t.isCleaning && this._removeStyles(t.to);
        for (var e in t.onTransitionEnd) t.onTransitionEnd[e].call(this);
      }),
      (d.transition = function(t) {
        if (!parseFloat(this.layout.options.transitionDuration))
          return void this._nonTransition(t);
        var e = this._transn;
        for (var i in t.onTransitionEnd) e.onEnd[i] = t.onTransitionEnd[i];
        for (i in t.to)
          (e.ingProperties[i] = !0), t.isCleaning && (e.clean[i] = !0);
        if (t.from) {
          this.css(t.from);
          var o = this.element.offsetHeight;
          o = null;
        }
        this.enableTransition(t.to),
          this.css(t.to),
          (this.isTransitioning = !0);
      });
    var l = "opacity," + n(a);
    (d.enableTransition = function() {
      if (!this.isTransitioning) {
        var t = this.layout.options.transitionDuration;
        (t = "number" == typeof t ? t + "ms" : t),
          this.css({
            transitionProperty: l,
            transitionDuration: t,
            transitionDelay: this.staggerDelay || 0
          }),
          this.element.addEventListener(u, this, !1);
      }
    }),
      (d.onwebkitTransitionEnd = function(t) {
        this.ontransitionend(t);
      }),
      (d.onotransitionend = function(t) {
        this.ontransitionend(t);
      });
    var f = { "-webkit-transform": "transform" };
    (d.ontransitionend = function(t) {
      if (t.target === this.element) {
        var e = this._transn,
          o = f[t.propertyName] || t.propertyName;
        if (
          (delete e.ingProperties[o],
          i(e.ingProperties) && this.disableTransition(),
          o in e.clean &&
            ((this.element.style[t.propertyName] = ""), delete e.clean[o]),
          o in e.onEnd)
        ) {
          var n = e.onEnd[o];
          n.call(this), delete e.onEnd[o];
        }
        this.emitEvent("transitionEnd", [this]);
      }
    }),
      (d.disableTransition = function() {
        this.removeTransitionStyles(),
          this.element.removeEventListener(u, this, !1),
          (this.isTransitioning = !1);
      }),
      (d._removeStyles = function(t) {
        var e = {};
        for (var i in t) e[i] = "";
        this.css(e);
      });
    var c = {
      transitionProperty: "",
      transitionDuration: "",
      transitionDelay: ""
    };
    return (
      (d.removeTransitionStyles = function() {
        this.css(c);
      }),
      (d.stagger = function(t) {
        (t = isNaN(t) ? 0 : t), (this.staggerDelay = t + "ms");
      }),
      (d.removeElem = function() {
        this.element.parentNode.removeChild(this.element),
          this.css({ display: "" }),
          this.emitEvent("remove", [this]);
      }),
      (d.remove = function() {
        return r && parseFloat(this.layout.options.transitionDuration)
          ? (this.once("transitionEnd", function() {
              this.removeElem();
            }),
            void this.hide())
          : void this.removeElem();
      }),
      (d.reveal = function() {
        delete this.isHidden, this.css({ display: "" });
        var t = this.layout.options,
          e = {},
          i = this.getHideRevealTransitionEndProperty("visibleStyle");
        (e[i] = this.onRevealTransitionEnd),
          this.transition({
            from: t.hiddenStyle,
            to: t.visibleStyle,
            isCleaning: !0,
            onTransitionEnd: e
          });
      }),
      (d.onRevealTransitionEnd = function() {
        this.isHidden || this.emitEvent("reveal");
      }),
      (d.getHideRevealTransitionEndProperty = function(t) {
        var e = this.layout.options[t];
        if (e.opacity) return "opacity";
        for (var i in e) return i;
      }),
      (d.hide = function() {
        (this.isHidden = !0), this.css({ display: "" });
        var t = this.layout.options,
          e = {},
          i = this.getHideRevealTransitionEndProperty("hiddenStyle");
        (e[i] = this.onHideTransitionEnd),
          this.transition({
            from: t.visibleStyle,
            to: t.hiddenStyle,
            isCleaning: !0,
            onTransitionEnd: e
          });
      }),
      (d.onHideTransitionEnd = function() {
        this.isHidden &&
          (this.css({ display: "none" }), this.emitEvent("hide"));
      }),
      (d.destroy = function() {
        this.css({
          position: "",
          left: "",
          right: "",
          top: "",
          bottom: "",
          transition: "",
          transform: ""
        });
      }),
      o
    );
  }),
  (function(t, e) {
    "use strict";
    "function" == typeof define && define.amd
      ? define("outlayer/outlayer", [
          "ev-emitter/ev-emitter",
          "get-size/get-size",
          "fizzy-ui-utils/utils",
          "./item"
        ], function(i, o, n, s) {
          return e(t, i, o, n, s);
        })
      : "object" == typeof module && module.exports
      ? (module.exports = e(
          t,
          require("ev-emitter"),
          require("get-size"),
          require("fizzy-ui-utils"),
          require("./item")
        ))
      : (t.Outlayer = e(
          t,
          t.EvEmitter,
          t.getSize,
          t.fizzyUIUtils,
          t.Outlayer.Item
        ));
  })(window, function(t, e, i, o, n) {
    "use strict";
    function s(t, e) {
      var i = o.getQueryElement(t);
      if (!i)
        return void (
          u &&
          u.error(
            "Bad element for " + this.constructor.namespace + ": " + (i || t)
          )
        );
      (this.element = i),
        h && (this.$element = h(this.element)),
        (this.options = o.extend({}, this.constructor.defaults)),
        this.option(e);
      var n = ++l;
      (this.element.outlayerGUID = n), (f[n] = this), this._create();
      var s = this._getOption("initLayout");
      s && this.layout();
    }
    function r(t) {
      function e() {
        t.apply(this, arguments);
      }
      return (
        (e.prototype = Object.create(t.prototype)),
        (e.prototype.constructor = e),
        e
      );
    }
    function a(t) {
      if ("number" == typeof t) return t;
      var e = t.match(/(^\d*\.?\d*)(\w*)/),
        i = e && e[1],
        o = e && e[2];
      if (!i.length) return 0;
      i = parseFloat(i);
      var n = m[o] || 1;
      return i * n;
    }
    var u = t.console,
      h = t.jQuery,
      d = function() {},
      l = 0,
      f = {};
    (s.namespace = "outlayer"),
      (s.Item = n),
      (s.defaults = {
        containerStyle: { position: "relative" },
        initLayout: !0,
        originLeft: !0,
        originTop: !0,
        resize: !0,
        resizeContainer: !0,
        transitionDuration: "0.4s",
        hiddenStyle: { opacity: 0, transform: "scale(0.001)" },
        visibleStyle: { opacity: 1, transform: "scale(1)" }
      });
    var c = s.prototype;
    o.extend(c, e.prototype),
      (c.option = function(t) {
        o.extend(this.options, t);
      }),
      (c._getOption = function(t) {
        var e = this.constructor.compatOptions[t];
        return e && void 0 !== this.options[e]
          ? this.options[e]
          : this.options[t];
      }),
      (s.compatOptions = {
        initLayout: "isInitLayout",
        horizontal: "isHorizontal",
        layoutInstant: "isLayoutInstant",
        originLeft: "isOriginLeft",
        originTop: "isOriginTop",
        resize: "isResizeBound",
        resizeContainer: "isResizingContainer"
      }),
      (c._create = function() {
        this.reloadItems(),
          (this.stamps = []),
          this.stamp(this.options.stamp),
          o.extend(this.element.style, this.options.containerStyle);
        var t = this._getOption("resize");
        t && this.bindResize();
      }),
      (c.reloadItems = function() {
        this.items = this._itemize(this.element.children);
      }),
      (c._itemize = function(t) {
        for (
          var e = this._filterFindItemElements(t),
            i = this.constructor.Item,
            o = [],
            n = 0;
          n < e.length;
          n++
        ) {
          var s = e[n],
            r = new i(s, this);
          o.push(r);
        }
        return o;
      }),
      (c._filterFindItemElements = function(t) {
        return o.filterFindElements(t, this.options.itemSelector);
      }),
      (c.getItemElements = function() {
        return this.items.map(function(t) {
          return t.element;
        });
      }),
      (c.layout = function() {
        this._resetLayout(), this._manageStamps();
        var t = this._getOption("layoutInstant"),
          e = void 0 !== t ? t : !this._isLayoutInited;
        this.layoutItems(this.items, e), (this._isLayoutInited = !0);
      }),
      (c._init = c.layout),
      (c._resetLayout = function() {
        this.getSize();
      }),
      (c.getSize = function() {
        this.size = i(this.element);
      }),
      (c._getMeasurement = function(t, e) {
        var o,
          n = this.options[t];
        n
          ? ("string" == typeof n
              ? (o = this.element.querySelector(n))
              : n instanceof HTMLElement && (o = n),
            (this[t] = o ? i(o)[e] : n))
          : (this[t] = 0);
      }),
      (c.layoutItems = function(t, e) {
        (t = this._getItemsForLayout(t)),
          this._layoutItems(t, e),
          this._postLayout();
      }),
      (c._getItemsForLayout = function(t) {
        return t.filter(function(t) {
          return !t.isIgnored;
        });
      }),
      (c._layoutItems = function(t, e) {
        if ((this._emitCompleteOnItems("layout", t), t && t.length)) {
          var i = [];
          t.forEach(function(t) {
            var o = this._getItemLayoutPosition(t);
            (o.item = t), (o.isInstant = e || t.isLayoutInstant), i.push(o);
          }, this),
            this._processLayoutQueue(i);
        }
      }),
      (c._getItemLayoutPosition = function() {
        return { x: 0, y: 0 };
      }),
      (c._processLayoutQueue = function(t) {
        this.updateStagger(),
          t.forEach(function(t, e) {
            this._positionItem(t.item, t.x, t.y, t.isInstant, e);
          }, this);
      }),
      (c.updateStagger = function() {
        var t = this.options.stagger;
        return null === t || void 0 === t
          ? void (this.stagger = 0)
          : ((this.stagger = a(t)), this.stagger);
      }),
      (c._positionItem = function(t, e, i, o, n) {
        o ? t.goTo(e, i) : (t.stagger(n * this.stagger), t.moveTo(e, i));
      }),
      (c._postLayout = function() {
        this.resizeContainer();
      }),
      (c.resizeContainer = function() {
        var t = this._getOption("resizeContainer");
        if (t) {
          var e = this._getContainerSize();
          e &&
            (this._setContainerMeasure(e.width, !0),
            this._setContainerMeasure(e.height, !1));
        }
      }),
      (c._getContainerSize = d),
      (c._setContainerMeasure = function(t, e) {
        if (void 0 !== t) {
          var i = this.size;
          i.isBorderBox &&
            (t += e
              ? i.paddingLeft +
                i.paddingRight +
                i.borderLeftWidth +
                i.borderRightWidth
              : i.paddingBottom +
                i.paddingTop +
                i.borderTopWidth +
                i.borderBottomWidth),
            (t = Math.max(t, 0)),
            (this.element.style[e ? "width" : "height"] = t + "px");
        }
      }),
      (c._emitCompleteOnItems = function(t, e) {
        function i() {
          n.dispatchEvent(t + "Complete", null, [e]);
        }
        function o() {
          r++, r == s && i();
        }
        var n = this,
          s = e.length;
        if (!e || !s) return void i();
        var r = 0;
        e.forEach(function(e) {
          e.once(t, o);
        });
      }),
      (c.dispatchEvent = function(t, e, i) {
        var o = e ? [e].concat(i) : i;
        if ((this.emitEvent(t, o), h))
          if (((this.$element = this.$element || h(this.element)), e)) {
            var n = h.Event(e);
            (n.type = t), this.$element.trigger(n, i);
          } else this.$element.trigger(t, i);
      }),
      (c.ignore = function(t) {
        var e = this.getItem(t);
        e && (e.isIgnored = !0);
      }),
      (c.unignore = function(t) {
        var e = this.getItem(t);
        e && delete e.isIgnored;
      }),
      (c.stamp = function(t) {
        (t = this._find(t)),
          t &&
            ((this.stamps = this.stamps.concat(t)),
            t.forEach(this.ignore, this));
      }),
      (c.unstamp = function(t) {
        (t = this._find(t)),
          t &&
            t.forEach(function(t) {
              o.removeFrom(this.stamps, t), this.unignore(t);
            }, this);
      }),
      (c._find = function(t) {
        if (t)
          return (
            "string" == typeof t && (t = this.element.querySelectorAll(t)),
            (t = o.makeArray(t))
          );
      }),
      (c._manageStamps = function() {
        this.stamps &&
          this.stamps.length &&
          (this._getBoundingRect(),
          this.stamps.forEach(this._manageStamp, this));
      }),
      (c._getBoundingRect = function() {
        var t = this.element.getBoundingClientRect(),
          e = this.size;
        this._boundingRect = {
          left: t.left + e.paddingLeft + e.borderLeftWidth,
          top: t.top + e.paddingTop + e.borderTopWidth,
          right: t.right - (e.paddingRight + e.borderRightWidth),
          bottom: t.bottom - (e.paddingBottom + e.borderBottomWidth)
        };
      }),
      (c._manageStamp = d),
      (c._getElementOffset = function(t) {
        var e = t.getBoundingClientRect(),
          o = this._boundingRect,
          n = i(t),
          s = {
            left: e.left - o.left - n.marginLeft,
            top: e.top - o.top - n.marginTop,
            right: o.right - e.right - n.marginRight,
            bottom: o.bottom - e.bottom - n.marginBottom
          };
        return s;
      }),
      (c.handleEvent = o.handleEvent),
      (c.bindResize = function() {
        t.addEventListener("resize", this), (this.isResizeBound = !0);
      }),
      (c.unbindResize = function() {
        t.removeEventListener("resize", this), (this.isResizeBound = !1);
      }),
      (c.onresize = function() {
        this.resize();
      }),
      o.debounceMethod(s, "onresize", 100),
      (c.resize = function() {
        this.isResizeBound && this.needsResizeLayout() && this.layout();
      }),
      (c.needsResizeLayout = function() {
        var t = i(this.element),
          e = this.size && t;
        return e && t.innerWidth !== this.size.innerWidth;
      }),
      (c.addItems = function(t) {
        var e = this._itemize(t);
        return e.length && (this.items = this.items.concat(e)), e;
      }),
      (c.appended = function(t) {
        var e = this.addItems(t);
        e.length && (this.layoutItems(e, !0), this.reveal(e));
      }),
      (c.prepended = function(t) {
        var e = this._itemize(t);
        if (e.length) {
          var i = this.items.slice(0);
          (this.items = e.concat(i)),
            this._resetLayout(),
            this._manageStamps(),
            this.layoutItems(e, !0),
            this.reveal(e),
            this.layoutItems(i);
        }
      }),
      (c.reveal = function(t) {
        if ((this._emitCompleteOnItems("reveal", t), t && t.length)) {
          var e = this.updateStagger();
          t.forEach(function(t, i) {
            t.stagger(i * e), t.reveal();
          });
        }
      }),
      (c.hide = function(t) {
        if ((this._emitCompleteOnItems("hide", t), t && t.length)) {
          var e = this.updateStagger();
          t.forEach(function(t, i) {
            t.stagger(i * e), t.hide();
          });
        }
      }),
      (c.revealItemElements = function(t) {
        var e = this.getItems(t);
        this.reveal(e);
      }),
      (c.hideItemElements = function(t) {
        var e = this.getItems(t);
        this.hide(e);
      }),
      (c.getItem = function(t) {
        for (var e = 0; e < this.items.length; e++) {
          var i = this.items[e];
          if (i.element == t) return i;
        }
      }),
      (c.getItems = function(t) {
        t = o.makeArray(t);
        var e = [];
        return (
          t.forEach(function(t) {
            var i = this.getItem(t);
            i && e.push(i);
          }, this),
          e
        );
      }),
      (c.remove = function(t) {
        var e = this.getItems(t);
        this._emitCompleteOnItems("remove", e),
          e &&
            e.length &&
            e.forEach(function(t) {
              t.remove(), o.removeFrom(this.items, t);
            }, this);
      }),
      (c.destroy = function() {
        var t = this.element.style;
        (t.height = ""),
          (t.position = ""),
          (t.width = ""),
          this.items.forEach(function(t) {
            t.destroy();
          }),
          this.unbindResize();
        var e = this.element.outlayerGUID;
        delete f[e],
          delete this.element.outlayerGUID,
          h && h.removeData(this.element, this.constructor.namespace);
      }),
      (s.data = function(t) {
        t = o.getQueryElement(t);
        var e = t && t.outlayerGUID;
        return e && f[e];
      }),
      (s.create = function(t, e) {
        var i = r(s);
        return (
          (i.defaults = o.extend({}, s.defaults)),
          o.extend(i.defaults, e),
          (i.compatOptions = o.extend({}, s.compatOptions)),
          (i.namespace = t),
          (i.data = s.data),
          (i.Item = r(n)),
          o.htmlInit(i, t),
          h && h.bridget && h.bridget(t, i),
          i
        );
      });
    var m = { ms: 1, s: 1e3 };
    return (s.Item = n), s;
  }),
  (function(t, e) {
    "function" == typeof define && define.amd
      ? define("isotope-layout/js/item", ["outlayer/outlayer"], e)
      : "object" == typeof module && module.exports
      ? (module.exports = e(require("outlayer")))
      : ((t.Isotope = t.Isotope || {}), (t.Isotope.Item = e(t.Outlayer)));
  })(window, function(t) {
    "use strict";
    function e() {
      t.Item.apply(this, arguments);
    }
    var i = (e.prototype = Object.create(t.Item.prototype)),
      o = i._create;
    (i._create = function() {
      (this.id = this.layout.itemGUID++), o.call(this), (this.sortData = {});
    }),
      (i.updateSortData = function() {
        if (!this.isIgnored) {
          (this.sortData.id = this.id),
            (this.sortData["original-order"] = this.id),
            (this.sortData.random = Math.random());
          var t = this.layout.options.getSortData,
            e = this.layout._sorters;
          for (var i in t) {
            var o = e[i];
            this.sortData[i] = o(this.element, this);
          }
        }
      });
    var n = i.destroy;
    return (
      (i.destroy = function() {
        n.apply(this, arguments), this.css({ display: "" });
      }),
      e
    );
  }),
  (function(t, e) {
    "function" == typeof define && define.amd
      ? define("isotope-layout/js/layout-mode", [
          "get-size/get-size",
          "outlayer/outlayer"
        ], e)
      : "object" == typeof module && module.exports
      ? (module.exports = e(require("get-size"), require("outlayer")))
      : ((t.Isotope = t.Isotope || {}),
        (t.Isotope.LayoutMode = e(t.getSize, t.Outlayer)));
  })(window, function(t, e) {
    "use strict";
    function i(t) {
      (this.isotope = t),
        t &&
          ((this.options = t.options[this.namespace]),
          (this.element = t.element),
          (this.items = t.filteredItems),
          (this.size = t.size));
    }
    var o = i.prototype,
      n = [
        "_resetLayout",
        "_getItemLayoutPosition",
        "_manageStamp",
        "_getContainerSize",
        "_getElementOffset",
        "needsResizeLayout",
        "_getOption"
      ];
    return (
      n.forEach(function(t) {
        o[t] = function() {
          return e.prototype[t].apply(this.isotope, arguments);
        };
      }),
      (o.needsVerticalResizeLayout = function() {
        var e = t(this.isotope.element),
          i = this.isotope.size && e;
        return i && e.innerHeight != this.isotope.size.innerHeight;
      }),
      (o._getMeasurement = function() {
        this.isotope._getMeasurement.apply(this, arguments);
      }),
      (o.getColumnWidth = function() {
        this.getSegmentSize("column", "Width");
      }),
      (o.getRowHeight = function() {
        this.getSegmentSize("row", "Height");
      }),
      (o.getSegmentSize = function(t, e) {
        var i = t + e,
          o = "outer" + e;
        if ((this._getMeasurement(i, o), !this[i])) {
          var n = this.getFirstItemSize();
          this[i] = (n && n[o]) || this.isotope.size["inner" + e];
        }
      }),
      (o.getFirstItemSize = function() {
        var e = this.isotope.filteredItems[0];
        return e && e.element && t(e.element);
      }),
      (o.layout = function() {
        this.isotope.layout.apply(this.isotope, arguments);
      }),
      (o.getSize = function() {
        this.isotope.getSize(), (this.size = this.isotope.size);
      }),
      (i.modes = {}),
      (i.create = function(t, e) {
        function n() {
          i.apply(this, arguments);
        }
        return (
          (n.prototype = Object.create(o)),
          (n.prototype.constructor = n),
          e && (n.options = e),
          (n.prototype.namespace = t),
          (i.modes[t] = n),
          n
        );
      }),
      i
    );
  }),
  (function(t, e) {
    "function" == typeof define && define.amd
      ? define("masonry-layout/masonry", [
          "outlayer/outlayer",
          "get-size/get-size"
        ], e)
      : "object" == typeof module && module.exports
      ? (module.exports = e(require("outlayer"), require("get-size")))
      : (t.Masonry = e(t.Outlayer, t.getSize));
  })(window, function(t, e) {
    var i = t.create("masonry");
    i.compatOptions.fitWidth = "isFitWidth";
    var o = i.prototype;
    return (
      (o._resetLayout = function() {
        this.getSize(),
          this._getMeasurement("columnWidth", "outerWidth"),
          this._getMeasurement("gutter", "outerWidth"),
          this.measureColumns(),
          (this.colYs = []);
        for (var t = 0; t < this.cols; t++) this.colYs.push(0);
        (this.maxY = 0), (this.horizontalColIndex = 0);
      }),
      (o.measureColumns = function() {
        if ((this.getContainerWidth(), !this.columnWidth)) {
          var t = this.items[0],
            i = t && t.element;
          this.columnWidth = (i && e(i).outerWidth) || this.containerWidth;
        }
        var o = (this.columnWidth += this.gutter),
          n = this.containerWidth + this.gutter,
          s = n / o,
          r = o - (n % o),
          a = r && r < 1 ? "round" : "floor";
        (s = Math[a](s)), (this.cols = Math.max(s, 1));
      }),
      (o.getContainerWidth = function() {
        var t = this._getOption("fitWidth"),
          i = t ? this.element.parentNode : this.element,
          o = e(i);
        this.containerWidth = o && o.innerWidth;
      }),
      (o._getItemLayoutPosition = function(t) {
        t.getSize();
        var e = t.size.outerWidth % this.columnWidth,
          i = e && e < 1 ? "round" : "ceil",
          o = Math[i](t.size.outerWidth / this.columnWidth);
        o = Math.min(o, this.cols);
        for (
          var n = this.options.horizontalOrder
              ? "_getHorizontalColPosition"
              : "_getTopColPosition",
            s = this[n](o, t),
            r = { x: this.columnWidth * s.col, y: s.y },
            a = s.y + t.size.outerHeight,
            u = o + s.col,
            h = s.col;
          h < u;
          h++
        )
          this.colYs[h] = a;
        return r;
      }),
      (o._getTopColPosition = function(t) {
        var e = this._getTopColGroup(t),
          i = Math.min.apply(Math, e);
        return { col: e.indexOf(i), y: i };
      }),
      (o._getTopColGroup = function(t) {
        if (t < 2) return this.colYs;
        for (var e = [], i = this.cols + 1 - t, o = 0; o < i; o++)
          e[o] = this._getColGroupY(o, t);
        return e;
      }),
      (o._getColGroupY = function(t, e) {
        if (e < 2) return this.colYs[t];
        var i = this.colYs.slice(t, t + e);
        return Math.max.apply(Math, i);
      }),
      (o._getHorizontalColPosition = function(t, e) {
        var i = this.horizontalColIndex % this.cols,
          o = t > 1 && i + t > this.cols;
        i = o ? 0 : i;
        var n = e.size.outerWidth && e.size.outerHeight;
        return (
          (this.horizontalColIndex = n ? i + t : this.horizontalColIndex),
          { col: i, y: this._getColGroupY(i, t) }
        );
      }),
      (o._manageStamp = function(t) {
        var i = e(t),
          o = this._getElementOffset(t),
          n = this._getOption("originLeft"),
          s = n ? o.left : o.right,
          r = s + i.outerWidth,
          a = Math.floor(s / this.columnWidth);
        a = Math.max(0, a);
        var u = Math.floor(r / this.columnWidth);
        (u -= r % this.columnWidth ? 0 : 1), (u = Math.min(this.cols - 1, u));
        for (
          var h = this._getOption("originTop"),
            d = (h ? o.top : o.bottom) + i.outerHeight,
            l = a;
          l <= u;
          l++
        )
          this.colYs[l] = Math.max(d, this.colYs[l]);
      }),
      (o._getContainerSize = function() {
        this.maxY = Math.max.apply(Math, this.colYs);
        var t = { height: this.maxY };
        return (
          this._getOption("fitWidth") &&
            (t.width = this._getContainerFitWidth()),
          t
        );
      }),
      (o._getContainerFitWidth = function() {
        for (var t = 0, e = this.cols; --e && 0 === this.colYs[e]; ) t++;
        return (this.cols - t) * this.columnWidth - this.gutter;
      }),
      (o.needsResizeLayout = function() {
        var t = this.containerWidth;
        return this.getContainerWidth(), t != this.containerWidth;
      }),
      i
    );
  }),
  (function(t, e) {
    "function" == typeof define && define.amd
      ? define("isotope-layout/js/layout-modes/masonry", [
          "../layout-mode",
          "masonry-layout/masonry"
        ], e)
      : "object" == typeof module && module.exports
      ? (module.exports = e(
          require("../layout-mode"),
          require("masonry-layout")
        ))
      : e(t.Isotope.LayoutMode, t.Masonry);
  })(window, function(t, e) {
    "use strict";
    var i = t.create("masonry"),
      o = i.prototype,
      n = { _getElementOffset: !0, layout: !0, _getMeasurement: !0 };
    for (var s in e.prototype) n[s] || (o[s] = e.prototype[s]);
    var r = o.measureColumns;
    o.measureColumns = function() {
      (this.items = this.isotope.filteredItems), r.call(this);
    };
    var a = o._getOption;
    return (
      (o._getOption = function(t) {
        return "fitWidth" == t
          ? void 0 !== this.options.isFitWidth
            ? this.options.isFitWidth
            : this.options.fitWidth
          : a.apply(this.isotope, arguments);
      }),
      i
    );
  }),
  (function(t, e) {
    "function" == typeof define && define.amd
      ? define("isotope-layout/js/layout-modes/fit-rows", ["../layout-mode"], e)
      : "object" == typeof exports
      ? (module.exports = e(require("../layout-mode")))
      : e(t.Isotope.LayoutMode);
  })(window, function(t) {
    "use strict";
    var e = t.create("fitRows"),
      i = e.prototype;
    return (
      (i._resetLayout = function() {
        (this.x = 0),
          (this.y = 0),
          (this.maxY = 0),
          this._getMeasurement("gutter", "outerWidth");
      }),
      (i._getItemLayoutPosition = function(t) {
        t.getSize();
        var e = t.size.outerWidth + this.gutter,
          i = this.isotope.size.innerWidth + this.gutter;
        0 !== this.x && e + this.x > i && ((this.x = 0), (this.y = this.maxY));
        var o = { x: this.x, y: this.y };
        return (
          (this.maxY = Math.max(this.maxY, this.y + t.size.outerHeight)),
          (this.x += e),
          o
        );
      }),
      (i._getContainerSize = function() {
        return { height: this.maxY };
      }),
      e
    );
  }),
  (function(t, e) {
    "function" == typeof define && define.amd
      ? define("isotope-layout/js/layout-modes/vertical", ["../layout-mode"], e)
      : "object" == typeof module && module.exports
      ? (module.exports = e(require("../layout-mode")))
      : e(t.Isotope.LayoutMode);
  })(window, function(t) {
    "use strict";
    var e = t.create("vertical", { horizontalAlignment: 0 }),
      i = e.prototype;
    return (
      (i._resetLayout = function() {
        this.y = 0;
      }),
      (i._getItemLayoutPosition = function(t) {
        t.getSize();
        var e =
            (this.isotope.size.innerWidth - t.size.outerWidth) *
            this.options.horizontalAlignment,
          i = this.y;
        return (this.y += t.size.outerHeight), { x: e, y: i };
      }),
      (i._getContainerSize = function() {
        return { height: this.y };
      }),
      e
    );
  }),
  (function(t, e) {
    "function" == typeof define && define.amd
      ? define([
          "outlayer/outlayer",
          "get-size/get-size",
          "desandro-matches-selector/matches-selector",
          "fizzy-ui-utils/utils",
          "isotope-layout/js/item",
          "isotope-layout/js/layout-mode",
          "isotope-layout/js/layout-modes/masonry",
          "isotope-layout/js/layout-modes/fit-rows",
          "isotope-layout/js/layout-modes/vertical"
        ], function(i, o, n, s, r, a) {
          return e(t, i, o, n, s, r, a);
        })
      : "object" == typeof module && module.exports
      ? (module.exports = e(
          t,
          require("outlayer"),
          require("get-size"),
          require("desandro-matches-selector"),
          require("fizzy-ui-utils"),
          require("isotope-layout/js/item"),
          require("isotope-layout/js/layout-mode"),
          require("isotope-layout/js/layout-modes/masonry"),
          require("isotope-layout/js/layout-modes/fit-rows"),
          require("isotope-layout/js/layout-modes/vertical")
        ))
      : (t.Isotope = e(
          t,
          t.Outlayer,
          t.getSize,
          t.matchesSelector,
          t.fizzyUIUtils,
          t.Isotope.Item,
          t.Isotope.LayoutMode
        ));
  })(window, function(t, e, i, o, n, s, r) {
    function a(t, e) {
      return function(i, o) {
        for (var n = 0; n < t.length; n++) {
          var s = t[n],
            r = i.sortData[s],
            a = o.sortData[s];
          if (r > a || r < a) {
            var u = void 0 !== e[s] ? e[s] : e,
              h = u ? 1 : -1;
            return (r > a ? 1 : -1) * h;
          }
        }
        return 0;
      };
    }
    var u = t.jQuery,
      h = String.prototype.trim
        ? function(t) {
            return t.trim();
          }
        : function(t) {
            return t.replace(/^\s+|\s+$/g, "");
          },
      d = e.create("isotope", {
        layoutMode: "masonry",
        isJQueryFiltering: !0,
        sortAscending: !0
      });
    (d.Item = s), (d.LayoutMode = r);
    var l = d.prototype;
    (l._create = function() {
      (this.itemGUID = 0),
        (this._sorters = {}),
        this._getSorters(),
        e.prototype._create.call(this),
        (this.modes = {}),
        (this.filteredItems = this.items),
        (this.sortHistory = ["original-order"]);
      for (var t in r.modes) this._initLayoutMode(t);
    }),
      (l.reloadItems = function() {
        (this.itemGUID = 0), e.prototype.reloadItems.call(this);
      }),
      (l._itemize = function() {
        for (
          var t = e.prototype._itemize.apply(this, arguments), i = 0;
          i < t.length;
          i++
        ) {
          var o = t[i];
          o.id = this.itemGUID++;
        }
        return this._updateItemsSortData(t), t;
      }),
      (l._initLayoutMode = function(t) {
        var e = r.modes[t],
          i = this.options[t] || {};
        (this.options[t] = e.options ? n.extend(e.options, i) : i),
          (this.modes[t] = new e(this));
      }),
      (l.layout = function() {
        return !this._isLayoutInited && this._getOption("initLayout")
          ? void this.arrange()
          : void this._layout();
      }),
      (l._layout = function() {
        var t = this._getIsInstant();
        this._resetLayout(),
          this._manageStamps(),
          this.layoutItems(this.filteredItems, t),
          (this._isLayoutInited = !0);
      }),
      (l.arrange = function(t) {
        this.option(t), this._getIsInstant();
        var e = this._filter(this.items);
        (this.filteredItems = e.matches),
          this._bindArrangeComplete(),
          this._isInstant
            ? this._noTransition(this._hideReveal, [e])
            : this._hideReveal(e),
          this._sort(),
          this._layout();
      }),
      (l._init = l.arrange),
      (l._hideReveal = function(t) {
        this.reveal(t.needReveal), this.hide(t.needHide);
      }),
      (l._getIsInstant = function() {
        var t = this._getOption("layoutInstant"),
          e = void 0 !== t ? t : !this._isLayoutInited;
        return (this._isInstant = e), e;
      }),
      (l._bindArrangeComplete = function() {
        function t() {
          e &&
            i &&
            o &&
            n.dispatchEvent("arrangeComplete", null, [n.filteredItems]);
        }
        var e,
          i,
          o,
          n = this;
        this.once("layoutComplete", function() {
          (e = !0), t();
        }),
          this.once("hideComplete", function() {
            (i = !0), t();
          }),
          this.once("revealComplete", function() {
            (o = !0), t();
          });
      }),
      (l._filter = function(t) {
        var e = this.options.filter;
        e = e || "*";
        for (
          var i = [], o = [], n = [], s = this._getFilterTest(e), r = 0;
          r < t.length;
          r++
        ) {
          var a = t[r];
          if (!a.isIgnored) {
            var u = s(a);
            u && i.push(a),
              u && a.isHidden ? o.push(a) : u || a.isHidden || n.push(a);
          }
        }
        return { matches: i, needReveal: o, needHide: n };
      }),
      (l._getFilterTest = function(t) {
        return u && this.options.isJQueryFiltering
          ? function(e) {
              return u(e.element).is(t);
            }
          : "function" == typeof t
          ? function(e) {
              return t(e.element);
            }
          : function(e) {
              return o(e.element, t);
            };
      }),
      (l.updateSortData = function(t) {
        var e;
        t ? ((t = n.makeArray(t)), (e = this.getItems(t))) : (e = this.items),
          this._getSorters(),
          this._updateItemsSortData(e);
      }),
      (l._getSorters = function() {
        var t = this.options.getSortData;
        for (var e in t) {
          var i = t[e];
          this._sorters[e] = f(i);
        }
      }),
      (l._updateItemsSortData = function(t) {
        for (var e = t && t.length, i = 0; e && i < e; i++) {
          var o = t[i];
          o.updateSortData();
        }
      });
    var f = (function() {
      function t(t) {
        if ("string" != typeof t) return t;
        var i = h(t).split(" "),
          o = i[0],
          n = o.match(/^\[(.+)\]$/),
          s = n && n[1],
          r = e(s, o),
          a = d.sortDataParsers[i[1]];
        return (t = a
          ? function(t) {
              return t && a(r(t));
            }
          : function(t) {
              return t && r(t);
            });
      }
      function e(t, e) {
        return t
          ? function(e) {
              return e.getAttribute(t);
            }
          : function(t) {
              var i = t.querySelector(e);
              return i && i.textContent;
            };
      }
      return t;
    })();
    (d.sortDataParsers = {
      parseInt: function(t) {
        return parseInt(t, 10);
      },
      parseFloat: function(t) {
        return parseFloat(t);
      }
    }),
      (l._sort = function() {
        if (this.options.sortBy) {
          var t = n.makeArray(this.options.sortBy);
          this._getIsSameSortBy(t) ||
            (this.sortHistory = t.concat(this.sortHistory));
          var e = a(this.sortHistory, this.options.sortAscending);
          this.filteredItems.sort(e);
        }
      }),
      (l._getIsSameSortBy = function(t) {
        for (var e = 0; e < t.length; e++)
          if (t[e] != this.sortHistory[e]) return !1;
        return !0;
      }),
      (l._mode = function() {
        var t = this.options.layoutMode,
          e = this.modes[t];
        if (!e) throw new Error("No layout mode: " + t);
        return (e.options = this.options[t]), e;
      }),
      (l._resetLayout = function() {
        e.prototype._resetLayout.call(this), this._mode()._resetLayout();
      }),
      (l._getItemLayoutPosition = function(t) {
        return this._mode()._getItemLayoutPosition(t);
      }),
      (l._manageStamp = function(t) {
        this._mode()._manageStamp(t);
      }),
      (l._getContainerSize = function() {
        return this._mode()._getContainerSize();
      }),
      (l.needsResizeLayout = function() {
        return this._mode().needsResizeLayout();
      }),
      (l.appended = function(t) {
        var e = this.addItems(t);
        if (e.length) {
          var i = this._filterRevealAdded(e);
          this.filteredItems = this.filteredItems.concat(i);
        }
      }),
      (l.prepended = function(t) {
        var e = this._itemize(t);
        if (e.length) {
          this._resetLayout(), this._manageStamps();
          var i = this._filterRevealAdded(e);
          this.layoutItems(this.filteredItems),
            (this.filteredItems = i.concat(this.filteredItems)),
            (this.items = e.concat(this.items));
        }
      }),
      (l._filterRevealAdded = function(t) {
        var e = this._filter(t);
        return (
          this.hide(e.needHide),
          this.reveal(e.matches),
          this.layoutItems(e.matches, !0),
          e.matches
        );
      }),
      (l.insert = function(t) {
        var e = this.addItems(t);
        if (e.length) {
          var i,
            o,
            n = e.length;
          for (i = 0; i < n; i++)
            (o = e[i]), this.element.appendChild(o.element);
          var s = this._filter(e).matches;
          for (i = 0; i < n; i++) e[i].isLayoutInstant = !0;
          for (this.arrange(), i = 0; i < n; i++) delete e[i].isLayoutInstant;
          this.reveal(s);
        }
      });
    var c = l.remove;
    return (
      (l.remove = function(t) {
        t = n.makeArray(t);
        var e = this.getItems(t);
        c.call(this, t);
        for (var i = e && e.length, o = 0; i && o < i; o++) {
          var s = e[o];
          n.removeFrom(this.filteredItems, s);
        }
      }),
      (l.shuffle = function() {
        for (var t = 0; t < this.items.length; t++) {
          var e = this.items[t];
          e.sortData.random = Math.random();
        }
        (this.options.sortBy = "random"), this._sort(), this._layout();
      }),
      (l._noTransition = function(t, e) {
        var i = this.options.transitionDuration;
        this.options.transitionDuration = 0;
        var o = t.apply(this, e);
        return (this.options.transitionDuration = i), o;
      }),
      (l.getFilteredItemElements = function() {
        return this.filteredItems.map(function(t) {
          return t.element;
        });
      }),
      d
    );
  });
